# Supplementary material for: Benefits And Limitations Of Three-Dimensional Printing Technology For Ecological Research
Source: bioRxiv or medRxiv preprint supplement (doi:10.1101/283895), 2018-03-27
Supplement: Supplementary file [file 283895-1.pdf]

**Additional File 1 for:**

2

**4 Benefits And Limitations Of Three-Dimensional Printing Technology For Ecological Research**6 Jocelyn E. Behm<sup>1,2\*</sup>, Brenna R. Waite<sup>1</sup>, S. Tonia Hsieh<sup>3</sup>, and Matthew R. Helmus<sup>1</sup><sup>1</sup>Integrative Ecology Lab, Center for Biodiversity, Department of Biology, Temple University, Philadelphia, PA, USA8 <sup>2</sup>Department of Ecological Science – Animal Ecology, VU University Amsterdam, Amsterdam, the Netherlands<sup>3</sup>Department of Biology, Temple University, Philadelphia, PA, USA10 **\*Correspondence:**

Jocelyn E. Behm

12 [jebehm@temple.edu](mailto:jebehm@temple.edu)

14 Table 1: Software for designing, modifying, and analyzing 3D files

| Name                 | Cost<br>(in 2017)                    | Purpose                                                                                                | Edit<br>3D<br>image | Generate<br>image from<br>photo | Build 3D<br>image<br>from<br>scratch | Image<br>analysis | Studies |
|----------------------|--------------------------------------|--------------------------------------------------------------------------------------------------------|---------------------|---------------------------------|--------------------------------------|-------------------|---------|
| 3D Lightyear         | Free                                 | Preparing 3D file to print; inputs STL/SLC files and prepares them for part building in other software | Yes                 | No                              | No                                   | No                | [1]     |
| Agisoft<br>PhotoScan | Reduced rate<br>academic<br>licenses | Photogrammetry software for processing digital images and generating 3D spatial data                   | Yes                 | Yes                             | No                                   | Yes               | [2]     |
| Amira                | Contact sales<br>rep                 | Visualizing, manipulating, and understanding data from CT, MRI, microscopy, and                        | No                  | Yes                             | No                                   | Yes               | [3]     |

|                        |                                      |                                                                    |     |     |     |     |            |  |
|------------------------|--------------------------------------|--------------------------------------------------------------------|-----|-----|-----|-----|------------|--|
|                        |                                      | other imaging methods.                                             |     |     |     |     |            |  |
| AutoCAD<br>(Autodesk)  | Reduced rate<br>academic<br>licenses | Computer-aided design and<br>drafting software for 3D<br>modelling | Yes | No  | No  | No  | [4]        |  |
| Blender                | Free                                 | 3D image modeling, rigging,<br>rendering                           | Yes | No  | Yes | No  | [5]        |  |
| Checkpoint             | Reduced rate<br>academic<br>licenses | 3D modeling, landmark<br>collection and editing.                   | Yes | Yes | No  | Yes | [6]        |  |
| CTan                   | Free                                 | 2D and 3D micro-CT dataset<br>analysis and visualization           | No  | No  | No  | Yes | [7]        |  |
| FreeCAD                | Free                                 | 3D modeling and modifying                                          | Yes | No  | Yes | No  | [8]        |  |
| Geomorph               | Free                                 | Geometric morphometric<br>shape analysis in R<br>environment       | Yes | No  | No  | Yes | -          |  |
| ImageJ                 | Free                                 | Image enhancement,<br>analysis, and editing                        | Yes | No  | No  | Yes | [5,7]      |  |
| Inventor<br>(Autodesk) | Free<br>Academic<br>License          | 3D mechanical design,<br>simulation, tooling                       | Yes | No  | No  | No  | [5]        |  |
| InVesalius             | Free                                 | Reconstruction of CT &<br>MRI                                      | No  | No  | No  | Yes | [7]        |  |
| Maya<br>(Autodesk)     | Free<br>Academic<br>License          | 3D animation, modeling,<br>rendering, simulation                   | Yes | No  | Yes | No  | This study |  |
| MeshLab                | Free                                 | Editing, cleaning, healing,<br>inspecting, rendering and           | Yes | No  | No  | No  | [7]        |  |

|                         |                                |                                                                                                 |     |     |     |     |         |  |
|-------------------------|--------------------------------|-------------------------------------------------------------------------------------------------|-----|-----|-----|-----|---------|--|
|                         |                                | converting unstructured 3D scans                                                                |     |     |     |     |         |  |
| Meshmixer (Autodesk)    | Free                           | 3D sculpting and image manipulation                                                             | Yes | No  | Yes | Yes | [9]     |  |
| MorphoJ                 | Free                           | Quantitative analysis of geometric morphometrics                                                | No  | No  | No  | Yes | [10,11] |  |
| OpenSCAD                | Free                           | Focuses on CAD rather than artistic aspects of generating and manipulating 3D modelling         | Yes | Yes | Yes | No  | [12]    |  |
| PhotoModeler Scanner    | \$2,495                        | Alternative to 3D laser scanning to create 3D models from photographs                           | No  | Yes | No  | Yes | [10]    |  |
| PhyloNimbus             | Free                           | Landmarks & linear/curve measurement of 2D or 3D projects                                       | No  | No  | No  | Yes | -       |  |
| Polyworks (Innovmetric) | Contact sales rep              | Comprehensive 3D modeling software system with universal file formats                           | Yes | Yes | Yes | Yes | -       |  |
| SketchUp (Google)       | Reduced rate academic licenses | Designing 3D imagery from scratch                                                               | No  | No  | Yes | No  | [13]    |  |
| Solid Works             | Contact sales rep              | Most aspects of 3D image generation and manipulation                                            | Yes | Yes | Yes | Yes | [12]    |  |
| TinkerCad               | Free                           | Highly accessible, web-based tool for designing new 3D models and, modifying existing 3D models | Yes | No  | Yes | No  | -       |  |

---

16

**Literature Cited**

- 18 1. Cvetkovic C, Raman R, Chan V, Williams BJ, Tolish M, Bajaj P, et al. Three-dimensionally printed biological machines powered by skeletal muscle. *PNAS*. 2014;111:10125–30.
- 20 2. Marchal AFJ, Lejeune P, de Bruyn PJN. Virtual plaster cast: digital 3D modelling of lion paws and tracks using close-range photogrammetry. *J. Zool.* 2016;300:111–9.
- 22 3. Vanderelst D, Peremans H, Razak NA, Verstraelen E, Dimitriadis G. The aerodynamic cost of head morphology in bats: Maybe not as bad as it seems. *PLOS ONE*. 2015;10:e0118545.
- 24 4. Rochman D, Luna ED. Prototyping the complex biological form of the beetle *Deltochilum lobipes* via 2D geometric morphometrics landmarks and descriptive geometry for 3D printing. *Computer-Aided Design and Applications*. 2017;14:107–16.
- 26 5. Igic B, Nunez V, Voss HU, Croston R, Aidala Z, López AV, et al. Using 3D printed eggs to examine the egg-rejection behaviour of wild birds. *PeerJ*. 2015;3:e965.
- 28 6. Ledoux L, Boudadi-Maligne M. The contribution of geometric morphometric analysis to prehistoric ichnology: the example of large canid tracks and their implication for the debate concerning wolf domestication. *Journal of Archaeological Science*. 2015;61:25–35.
- 30 7. Dal Ferro N, Morari F. From real soils to 3D-printed soils: Reproduction of complex pore network at the real size in a silty-loam soil. *Soil Science Society of America Journal*. 2015;79:1008–17.
- 32 8. Watson CM, Francis GR. Three dimensional printing as an effective method of producing anatomically accurate models for studies in thermal ecology. *Journal of Thermal Biology*. 2015;51:42–6.

- 34 9. Gutierrez-Heredia L, Benzoni F, Murphy E, Reynaud EG. End to End Digitisation and Analysis of Three-Dimensional Coral Models, from Communities to Corallites. PLOS ONE. 2016;11:e0149641.
- 36 10. Chiari Y, Wang B, Rushmeier H, Caccone A. Using Digital Images to Reconstruct Three-Dimensional Biological Forms: A New Tool for Morphological Studies. Biological Journal of the Linnean Society. 2008;95:425–36.
- 38 11. Lamb T, Pollard R, Bond JE. Genetic variation corroborates subspecific delimitation in the Namib fog-basking beetle, *Onymacris unguicularis* (Haag) (Tenebrionidae, Coleoptera). Zookeys. 2013;47–60.
- 40 12. Berry D, Selby RD, Horvath JC, Cameron RH, Porqueras D, Stouthamer R. A modular system of 3D printed emergence traps for studying the biology of shot hole borers and other scolytinae. J Econ Entomol. 2016;109:969–72.
- 42 13. Chetverikov PE. Hidden diversity of endoparasitic eriophyoid mites: two new *Novophytoptus* Roivainen, 1947 (Acari: Eriophyoidea: Phytoptidae) species from the parenchymatous tissues of rushes (Juncaceae). Zootaxa. 2015;4006:481–505.
