# Supplementary material for: Benefits And Limitations Of Three-Dimensional Printing Technology For Ecological Research
Source: bioRxiv or medRxiv preprint supplement (doi:10.1101/283895), 2018-03-27
Supplement: Supplementary file [file media-2.pdf]

1 **Additional File 2 for:**

2

3 **Benefits And Limitations Of Three-Dimensional Printing Technology For Ecological**  
 4 **Research**

5

6 Jocelyn E. Behm<sup>1,2\*</sup>, Brenna R. Waite<sup>1</sup>, S. Tonia Hsieh<sup>3</sup>, and Matthew R. Helmus<sup>1</sup>

7 <sup>1</sup>Integrative Ecology Lab, Center for Biodiversity, Department of Biology, Temple University,  
 8 Philadelphia, PA, USA

9 <sup>2</sup>Department of Ecological Science – Animal Ecology, VU University Amsterdam, Amsterdam,  
 10 the Netherlands

11 <sup>3</sup>Department of Biology, Temple University, Philadelphia, PA, USA

12 **\*Correspondence:**

13 Jocelyn E. Behm

14 [jebehm@temple.edu](mailto:jebehm@temple.edu)

15

16 Table 2: Online libraries of 3D imagery relevant for ecological research (as of 2017)

| Name                      | Website                                                                             | Description                                                                                                                              |
|---------------------------|-------------------------------------------------------------------------------------|------------------------------------------------------------------------------------------------------------------------------------------|
| Cgtrader                  | <a href="https://www.cgtrader.com/3d-models">https://www.cgtrader.com/3d-models</a> | Repository of professional 3D models                                                                                                     |
| GrabCAD                   | <a href="https://grabcad.com/">https://grabcad.com/</a>                             | Allows for printing straight from CAD; has a collaboration tool for working on group projects; also has library of free 3D imagery files |
| NIH 3D Print Exchange     | <a href="https://3dprint.nih.gov/">https://3dprint.nih.gov/</a>                     | Provides scientifically accurate and medically applicable 3D models that are readily compatible with 3D printers.                        |
| Sketchfab                 | <a href="https://sketchfab.com/">https://sketchfab.com/</a>                         | Platform for sharing 3D images on social media; also allows for 3D content to be embedded on webpages and social media                   |
| Thingiverse (by Makerbot) | <a href="http://www.thingiverse.com/">http://www.thingiverse.com/</a>               | Largest online community for sharing 3D models on an open platform                                                                       |
| Dryad                     | <a href="http://datadryad.org/">http://datadryad.org/</a>                           | Repository for scientific files including 3D media                                                                                       |
| STL Finder                | <a href="https://www.stlfinder.com/">https://www.stlfinder.com/</a>                 | Search engine for 3D models                                                                                                              |

17
